# Supplementary material
Source: MDPI journal article supplement (https://www.mdpi.com/2304-6740/11/3/131)
Supplement: s1 [file s1]

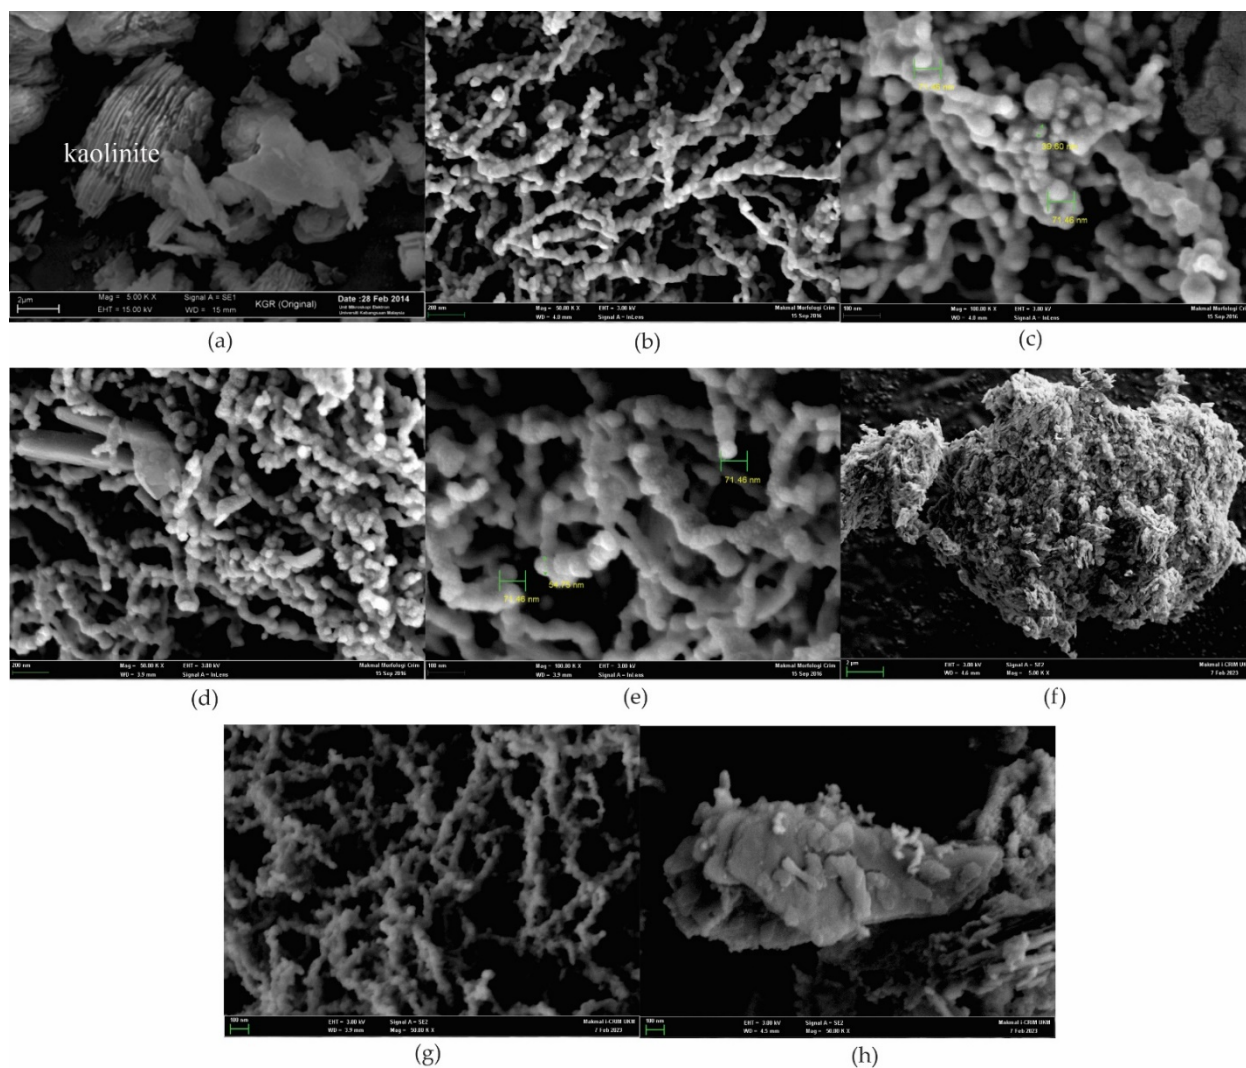

**Figure S1.** The morphologies before treatment; SEM for (a) Gr; 5000 $\times$  and FESEM for (b) nZVI; Mag: 50,000 $\times$ , (c) nZVI; Mag: 100,000 $\times$ , (d) Gr-nZVI; Mag: 50,000 $\times$ , (e) Gr-nZVI; Mag: 100,000 $\times$  while the morphologies after treatment; FESEM for (f) Gr; Mag: 5000 $\times$  (g) nZVI; Mag: 50,000 $\times$ , (h) Gr-nZVI; Mag: 50,000 $\times$ .

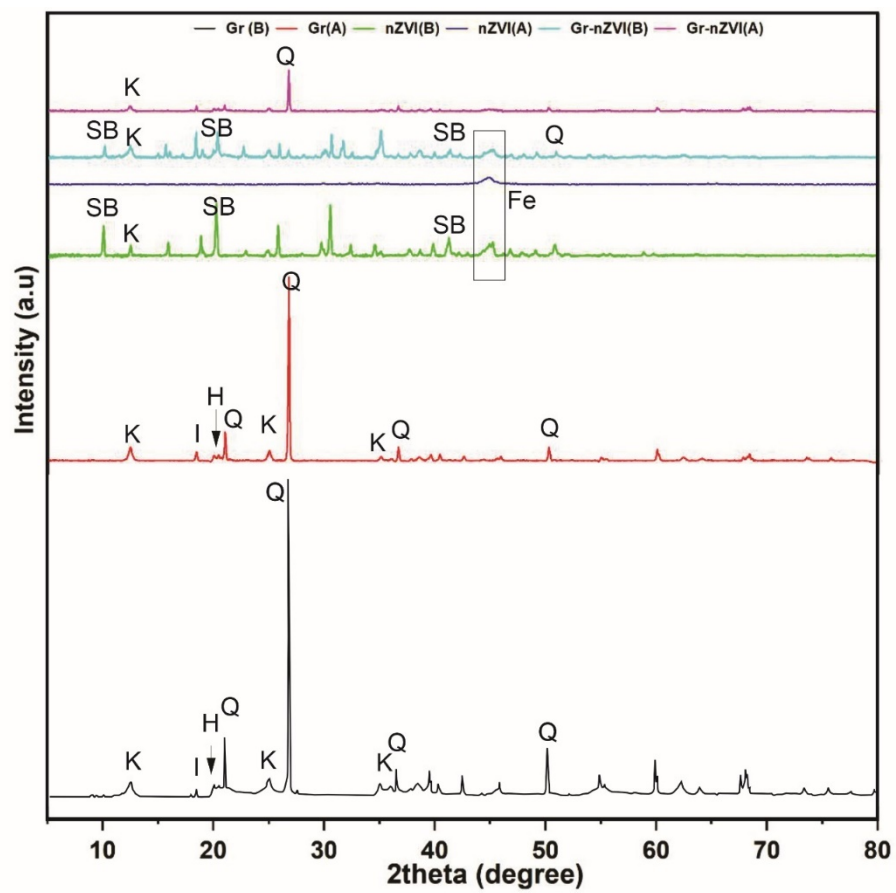

**Figure S2.** The XRD results for all samples. [SB=sodium borate,  $\text{Na}_2\text{B}_4\text{O}_7$ , Q=Quartz, K=kaolinite, H=halloysite, Fe= iron  $\text{Fe}^0$ ]

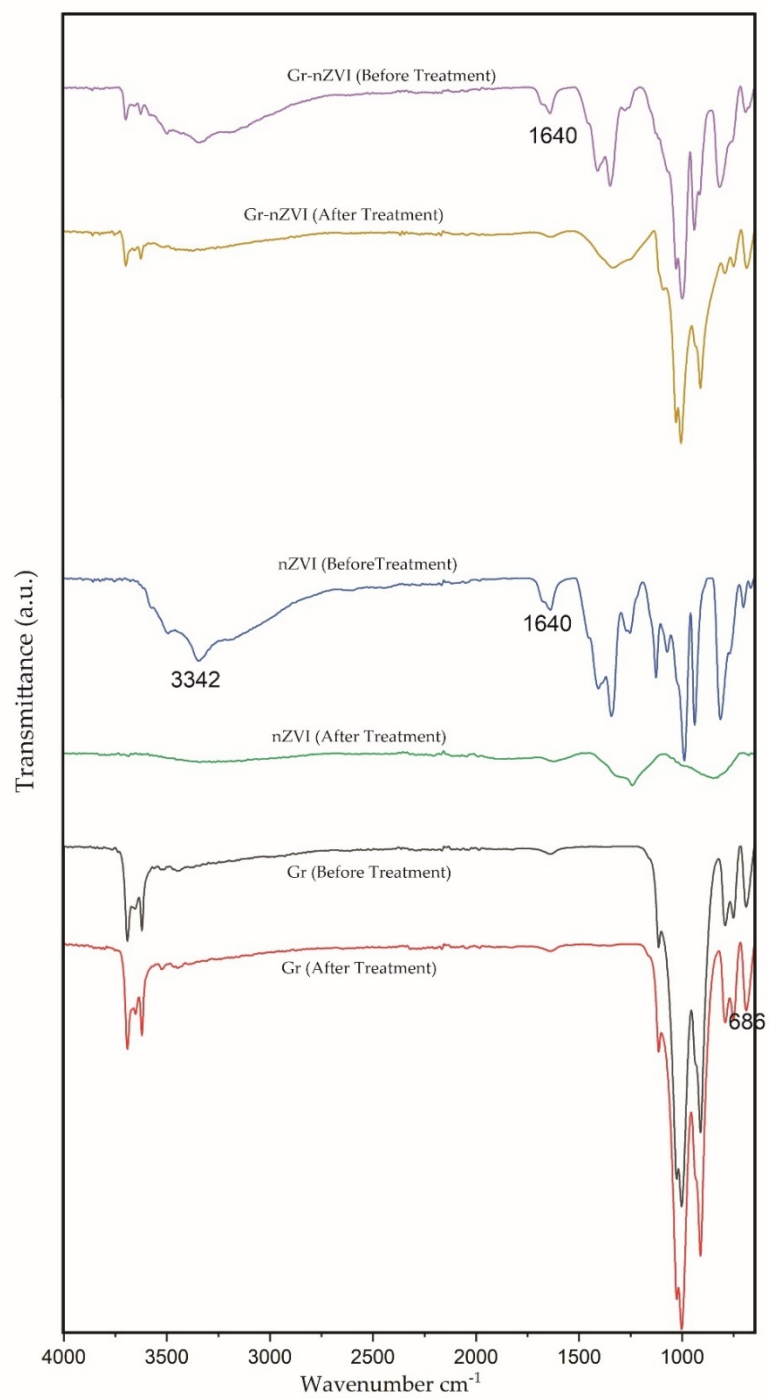

**Figure S3.** The FTIR spectrum of nZVI, Gr and Gr-nZVI before and after the treatment

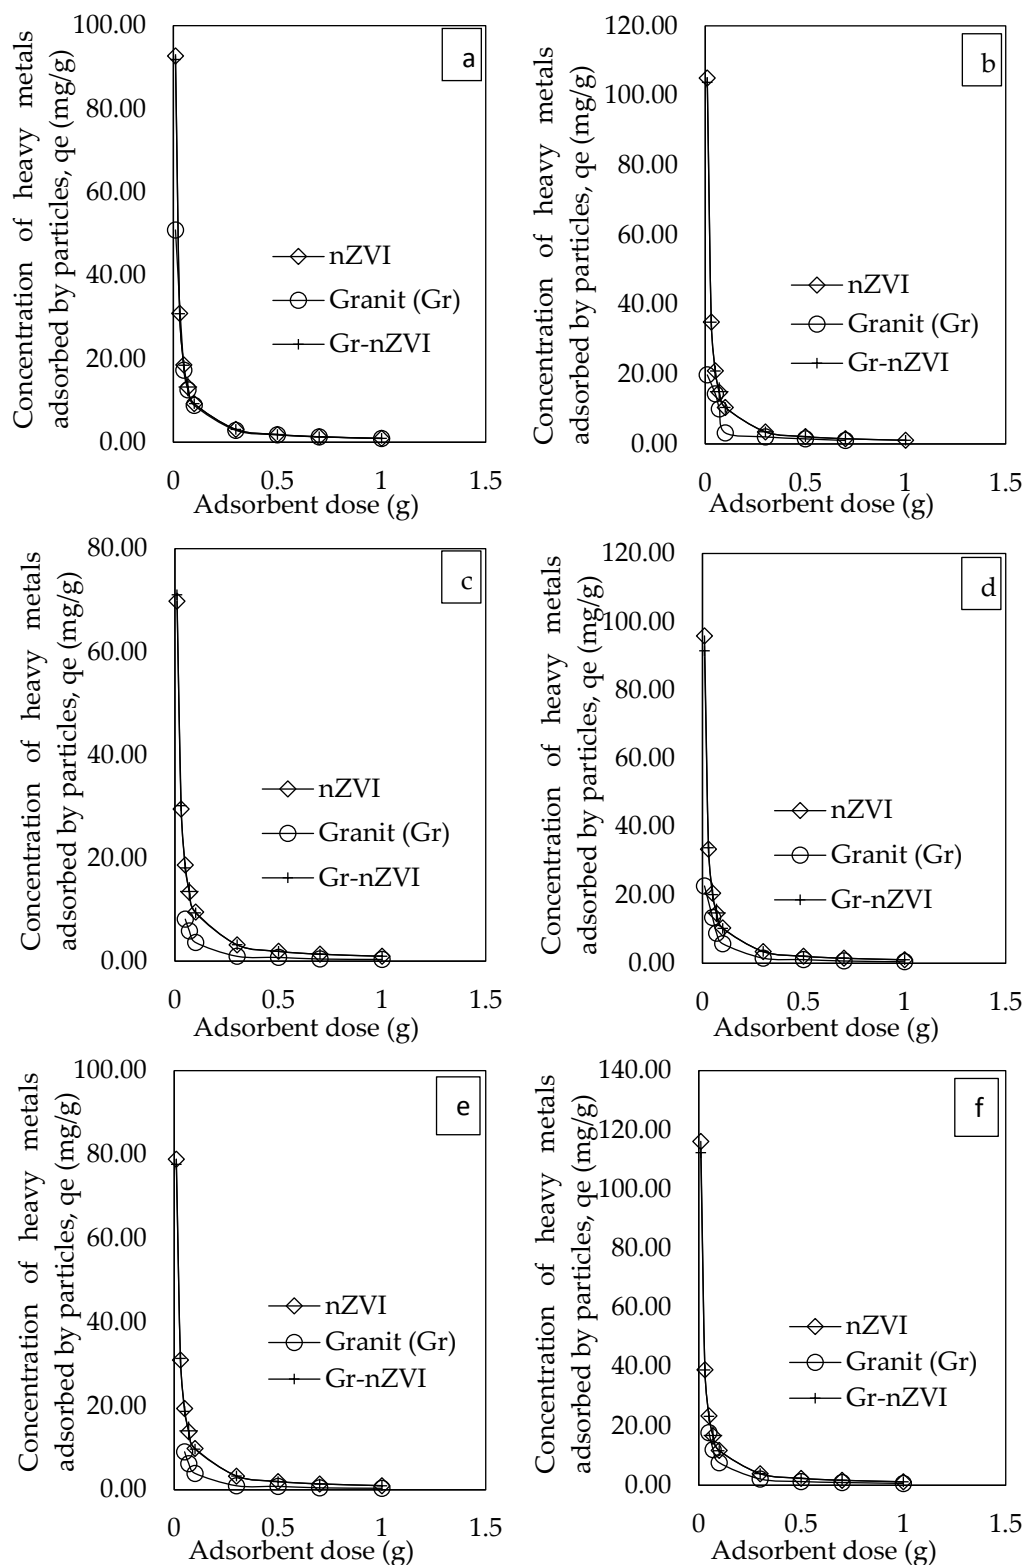

**Figure S4.** Effect of adsorbent dosage on heavy metals (a) Pb, (b) Cu, (c) Co, (d) Cd, (e) Ni, (f) Zn adsorption capacity ( $C_0 = 50$  mg/L,  $V = 30$  ml, pH=6, shaking time= 3h, Temperature= 25°C).

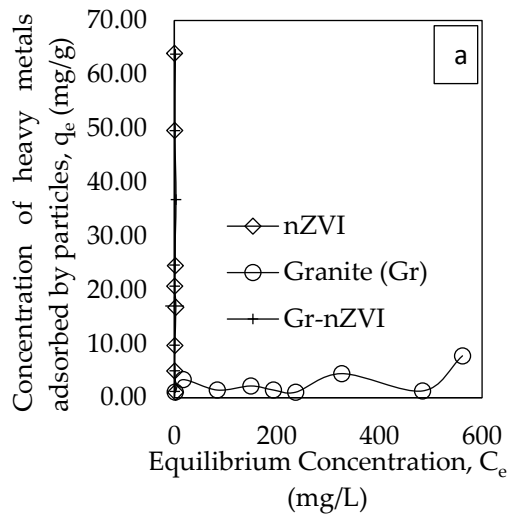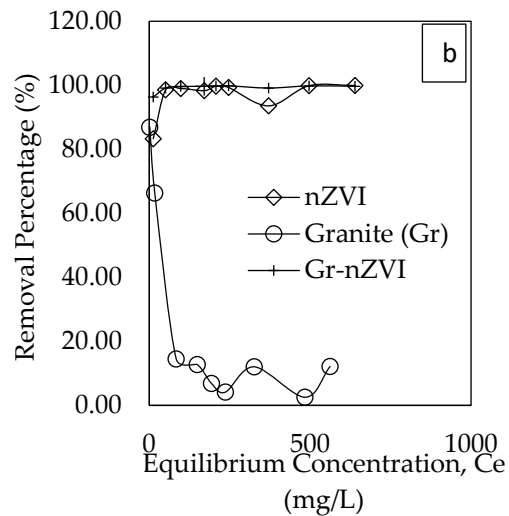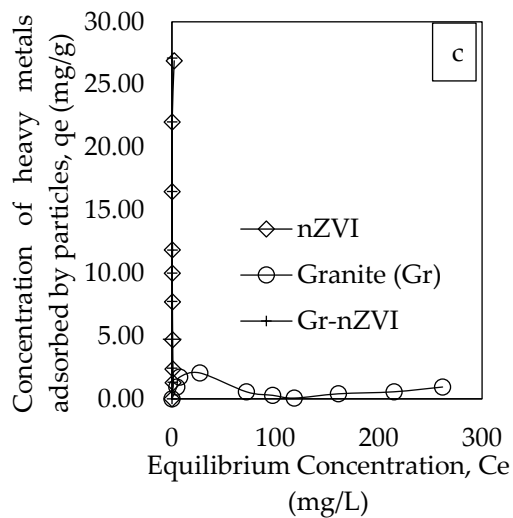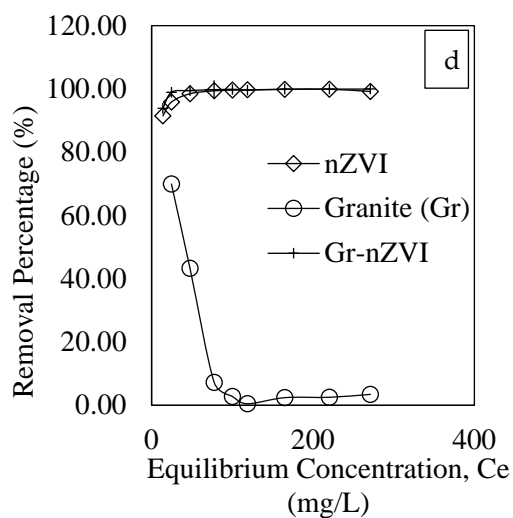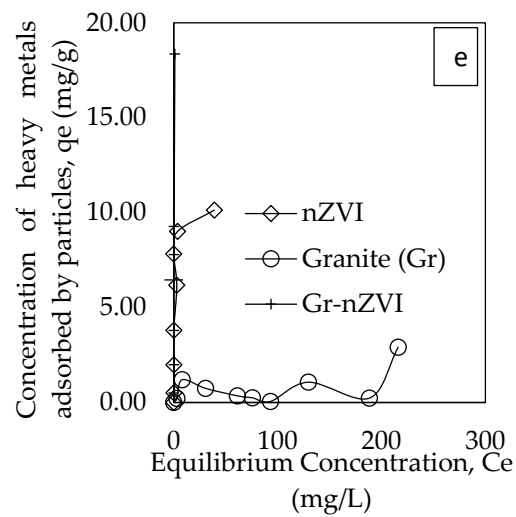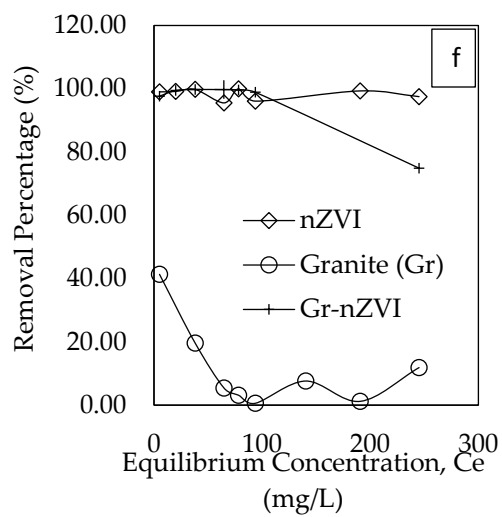

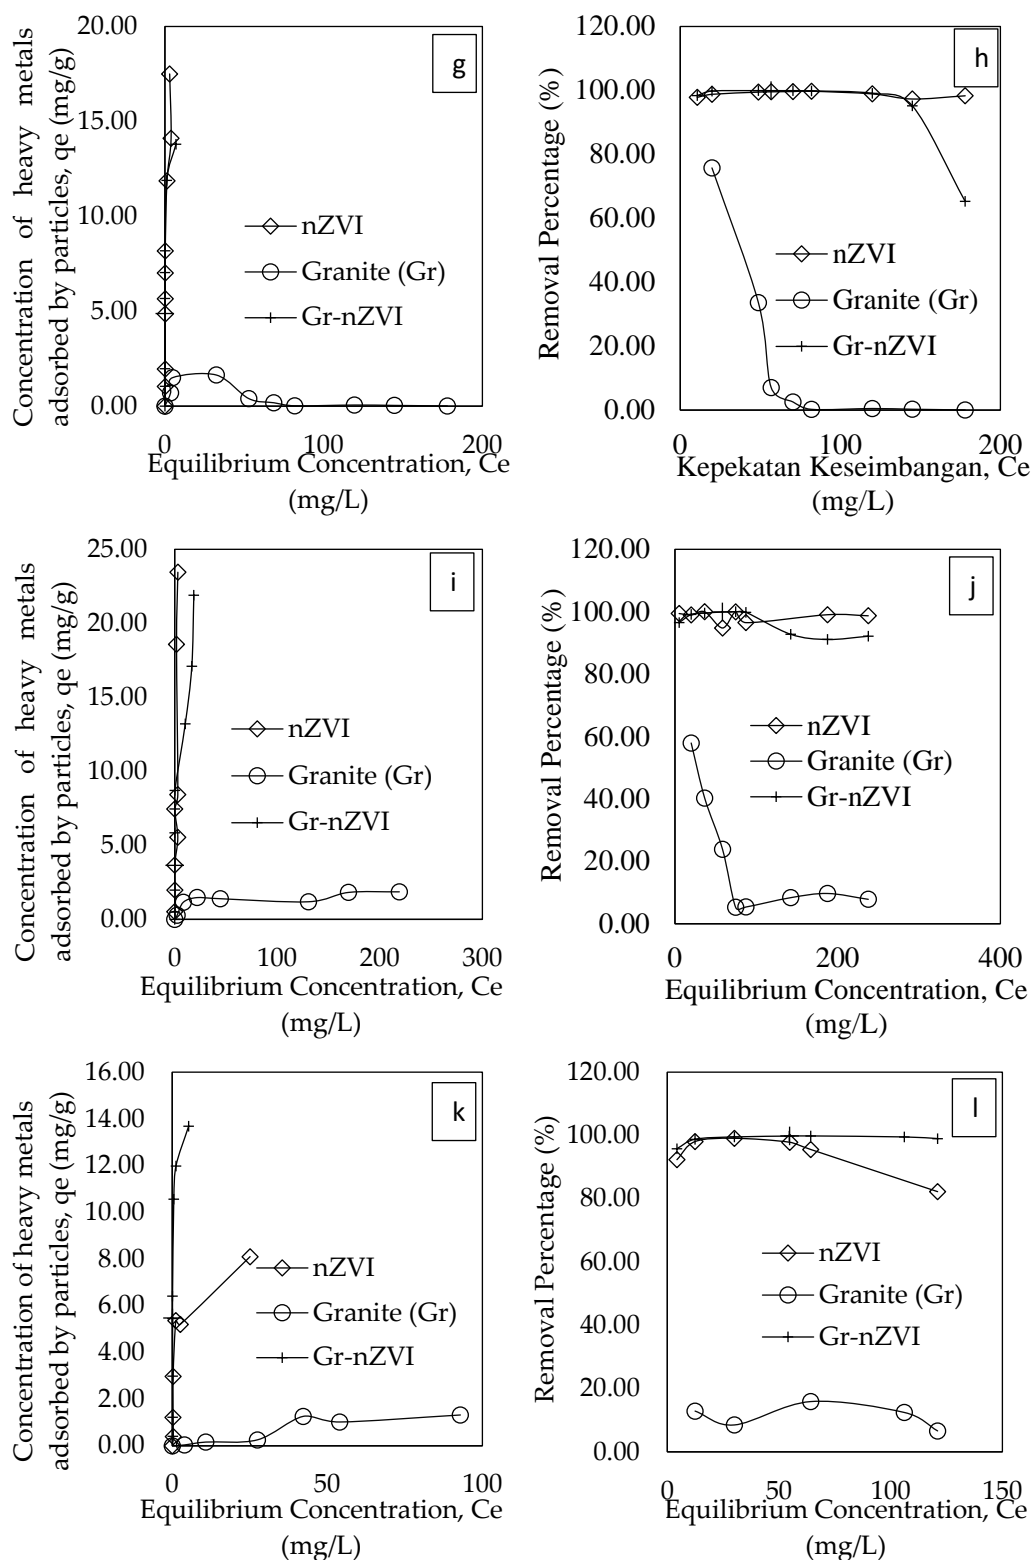

**Figure S5.** Effect of initial concentration and removal percentage on heavy metals Pb (a and b), Cu (c and d), Co (e and f), Cd (g and h), Ni (i and j) and Zn (k and l) adsorption capacity ( $M=0.5$  g,  $V=50$  ml,  $pH=6$ , shaking time= 3h, Temperature= 25°C).

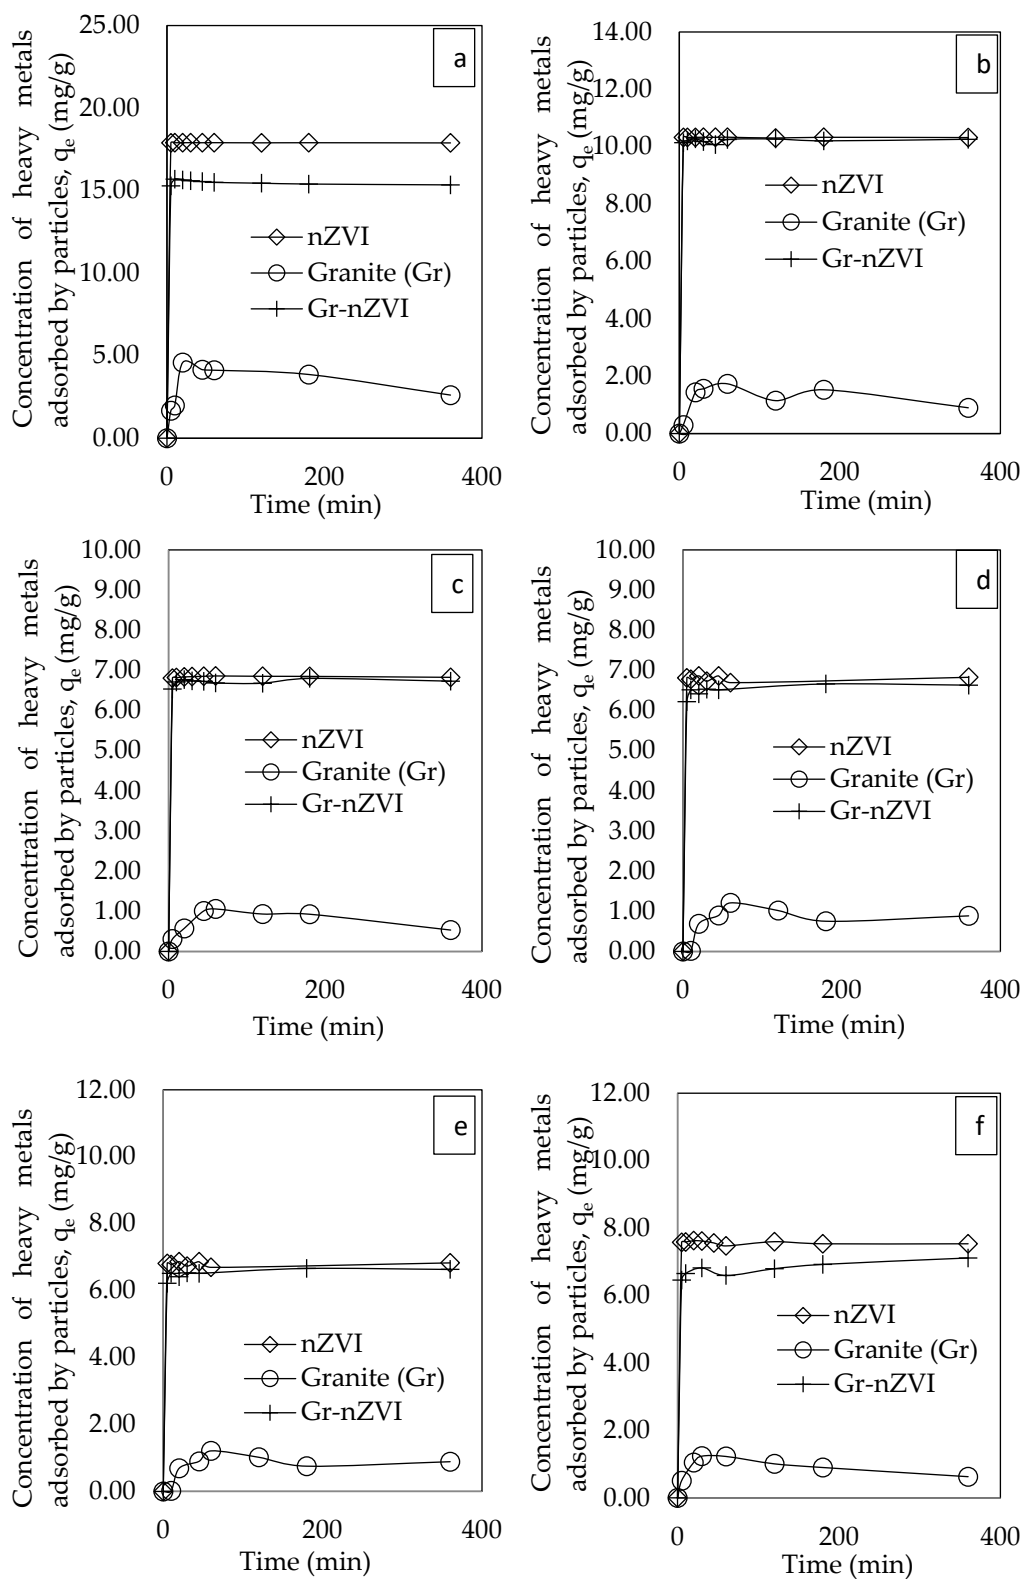

**Figure S6.** Effect of contact time on heavy metals (a) Pb, (b) Cu, (c) Co, (d) Cd, (e) Ni, (f) Zn adsorption capacity ( $C_0=50$  mg/L,  $M=0.5$  g,  $V=50$  ml,  $pH=6$ , Temperature=  $25^\circ\text{C}$ )

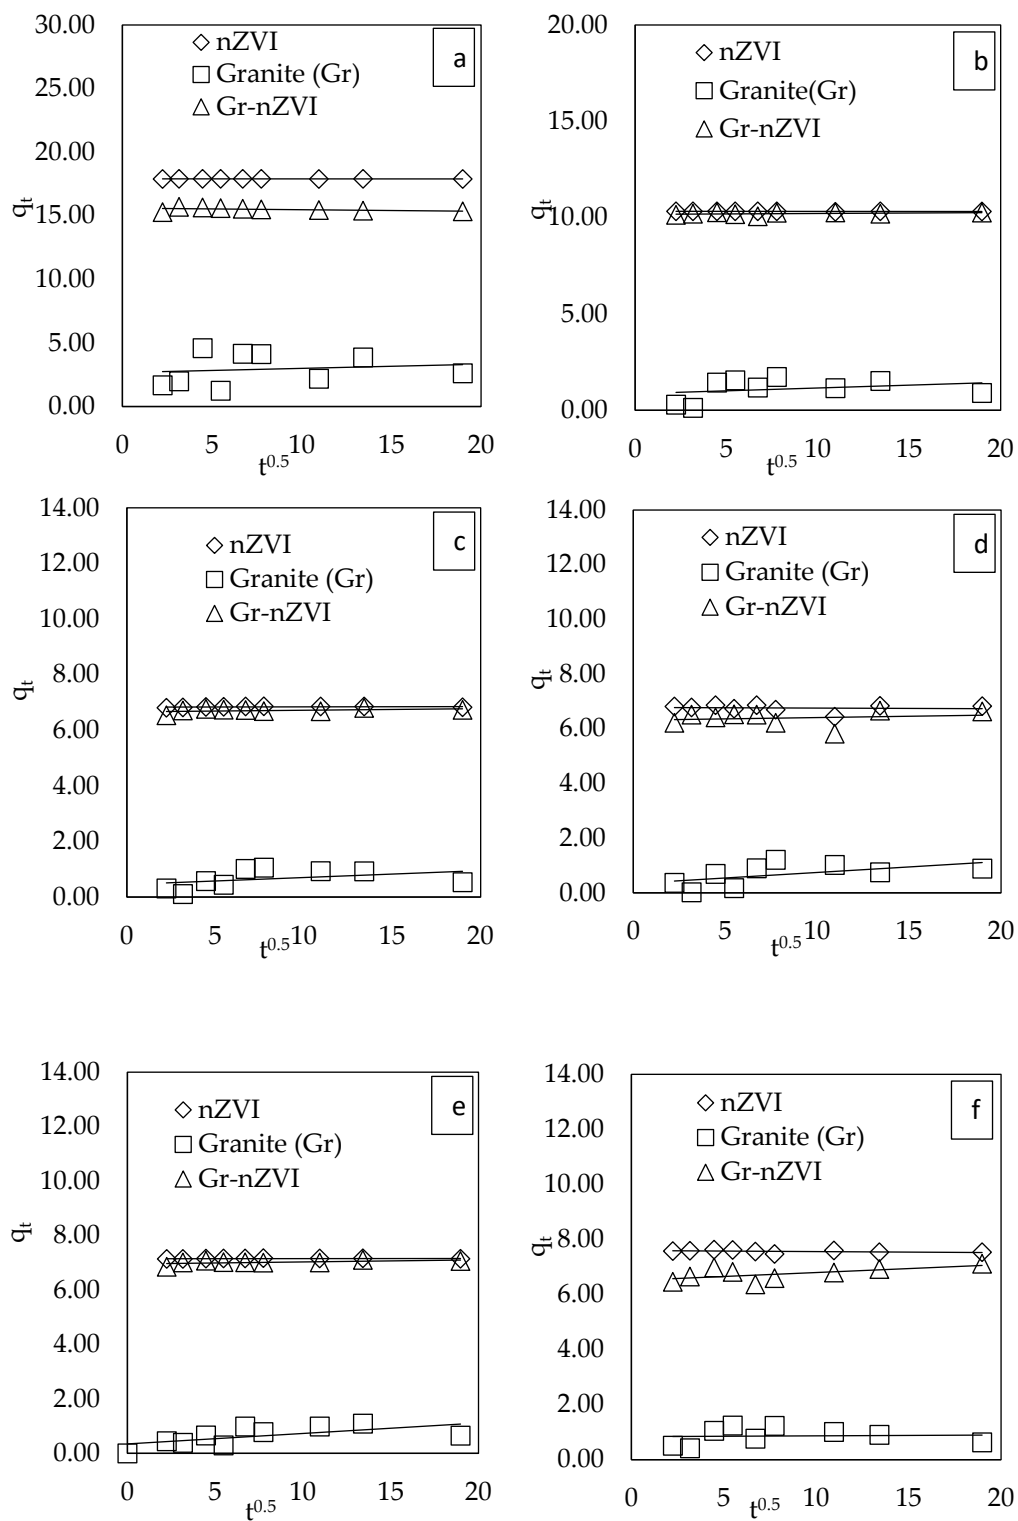

**Figure S7.** Plot of intraparticle diffusion modelling of heavy metals (a) Pb, (b) Cu, (c) Co, (d) Cd, (e) Ni, (f) Zn onto adsorbents (nZVI, Gr and Gr-nZVI)



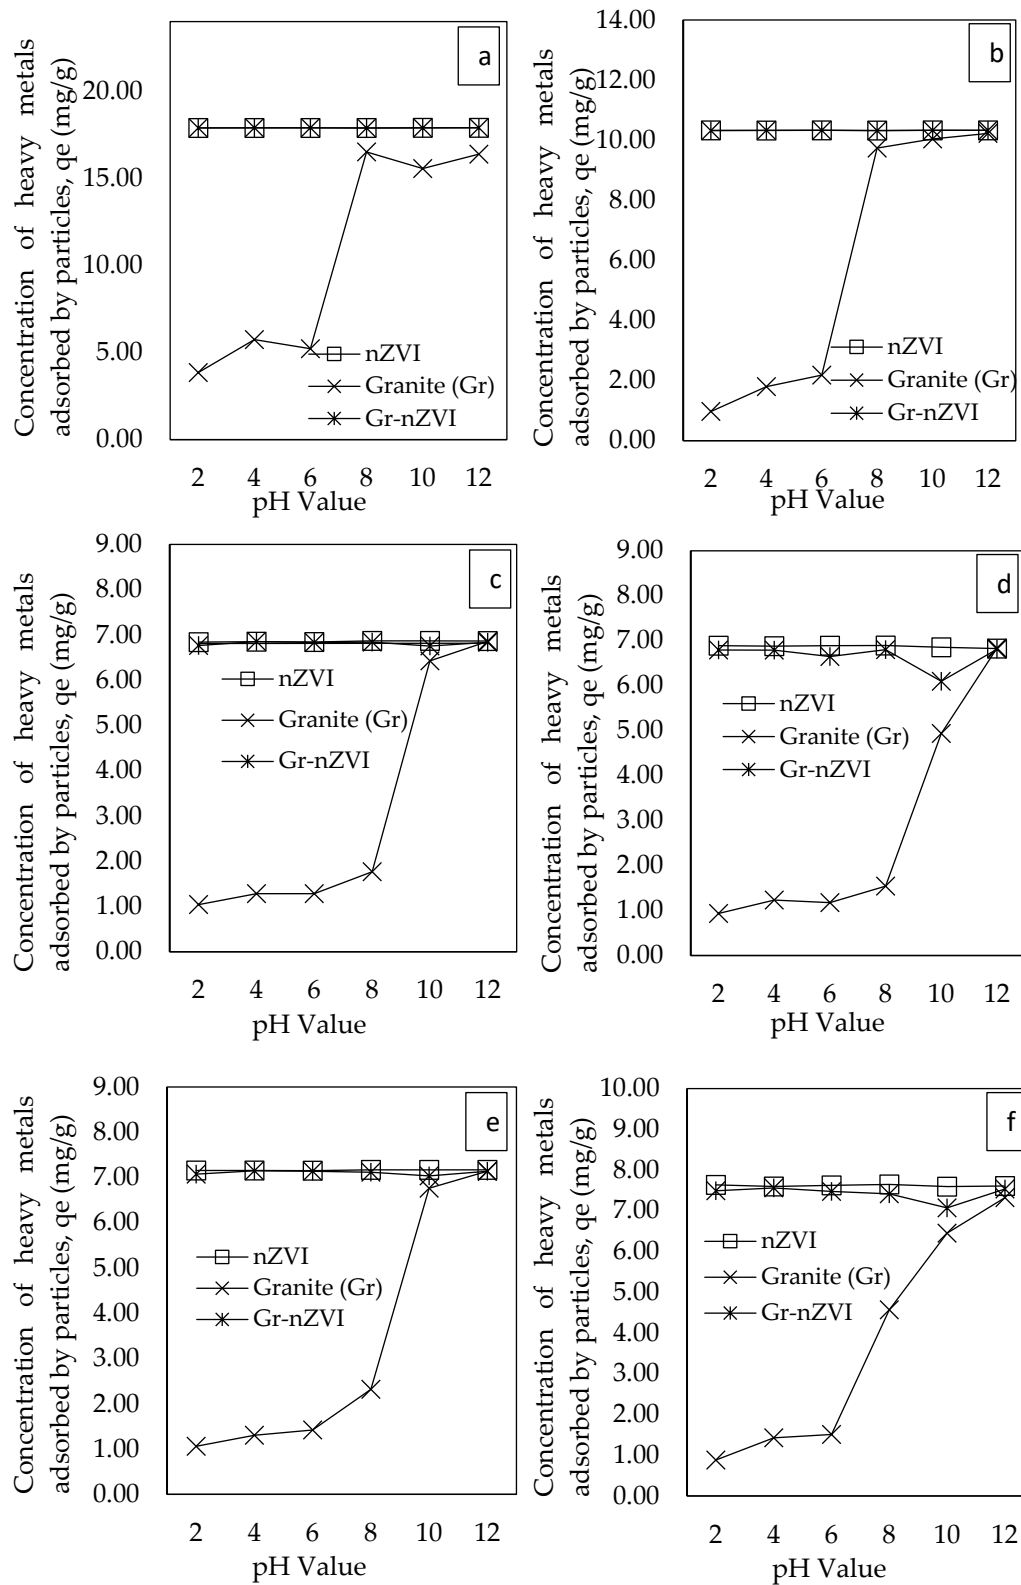

**Figure S8.** Effect of initial pH on heavy metals (a) Pb, (b) Cu, (c) Co, (d) Cd, (e) Ni, (f) Zn adsorption capacity (Co= 50 mg/L, M= 0.5 g, V= 50 ml, shaking time= 3h, Temperature= 25°C)

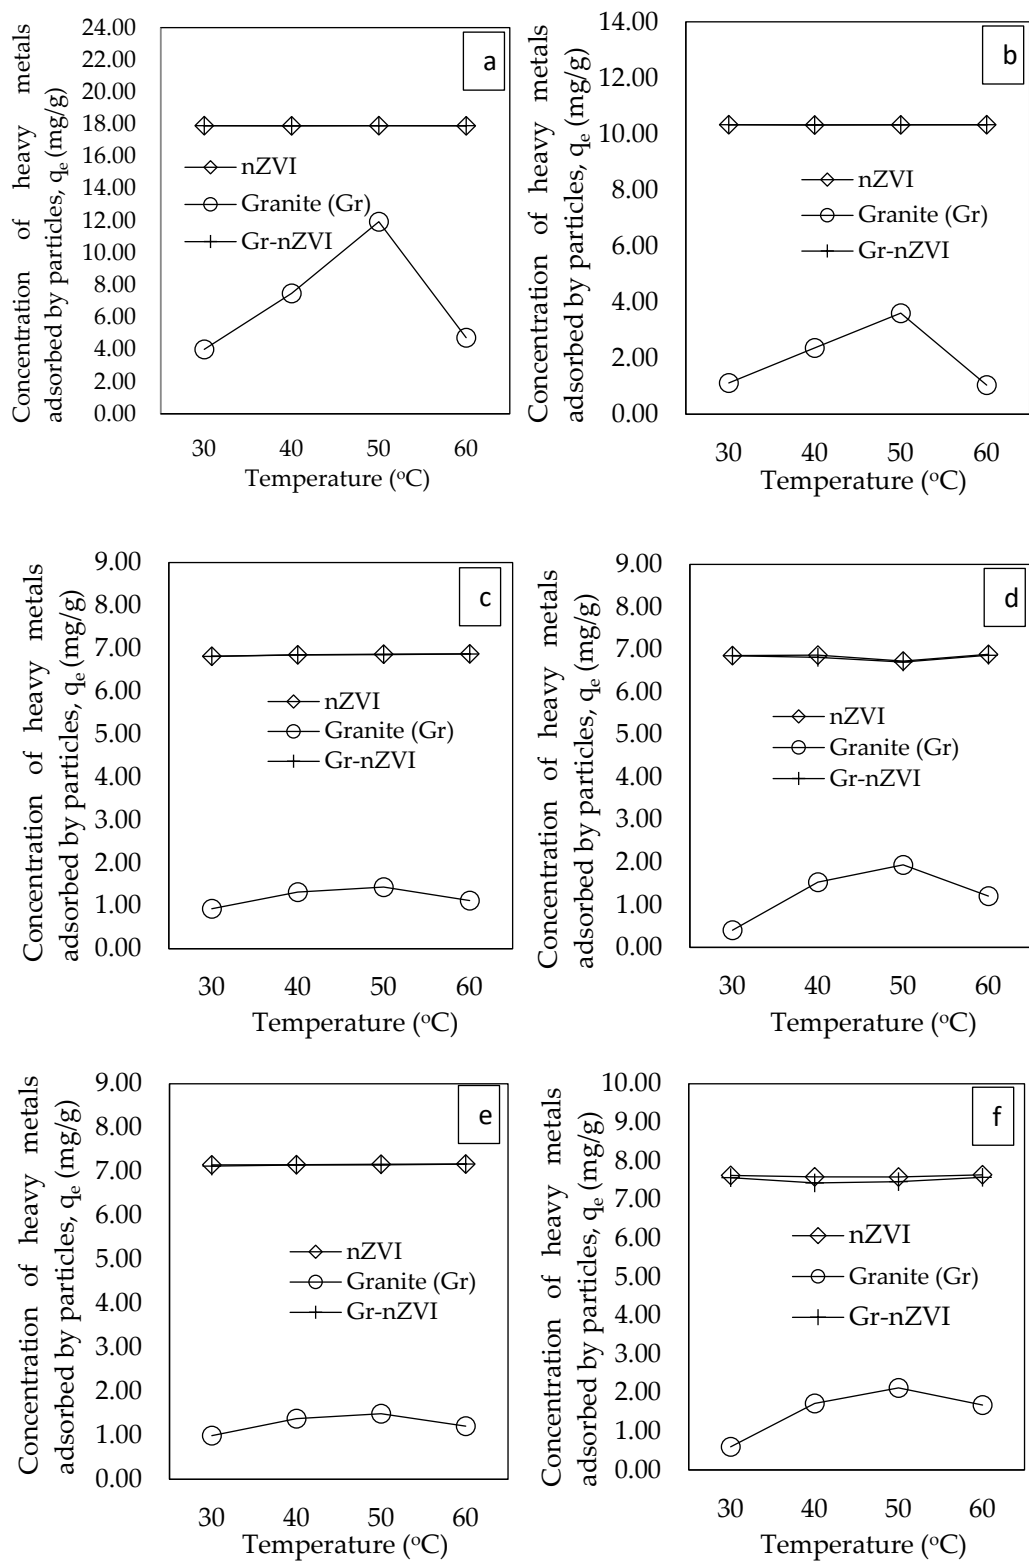

**Figure S9.** Effect of temperature on heavy metals (a) Pb, (b) Cu, (c) Co, (d) Cd, (e) Ni, (f) Zn adsorption capacity (Co= 50 mg/L, M= 0.5 g, V= 50 ml, pH=6, shaking time= 3h)

**Table S1.** Linear equation of adsorption isotherm and kinetic model

| Model                   | Equation                                                                                                                                                                                                                                                                                                                                                                                    | Significance                                                                                    | Plots                    |
|-------------------------|---------------------------------------------------------------------------------------------------------------------------------------------------------------------------------------------------------------------------------------------------------------------------------------------------------------------------------------------------------------------------------------------|-------------------------------------------------------------------------------------------------|--------------------------|
| Langmuir                | $C_e/q_e = 1/K_L \cdot A_m + C_e/A_m$ <p>Where, <math>K_L</math> is the Langmuir binding constant (L/mg), <math>A_m</math> is the saturated adsorption amount of metal ions (mg/g) and <math>C_e</math> is the equilibrium concentration of metal ions (mg/L)</p>                                                                                                                           | Signifies monolayer adsorption of adsorbate molecules onto adsorbent                            | $C_e/q_e$ vs $C_e$       |
| Freundlich              | $\log q_e = \log K_F + (1/n) \log C_e$ <p>Where, <math>K_F</math> is the Freundlich sorption coefficient, <math>1/n</math> is Freundlich sorption exponent and <math>C_e</math> is the metal concentration in final contact concentration (mg/L).</p>                                                                                                                                       | Surface heterogeneity and exponential distribution of active sites and their energies           | $\log q_e$ vs $\log C_e$ |
| Pseudo first order      | $\ln (q_e - q_t) = \ln(q_e) - \frac{k_1}{2.303} t$ <p>where <math>q_e</math> and <math>q_t</math> represents the adsorption capacity of adsorbent at equilibrium and time <math>t</math> in mg/g, respectively, <math>k_1</math> is the pseudo first-order rate constant, and <math>t</math> is the contact time (min)</p>                                                                  | Adsorption at the solid-liquid interface                                                        | $\ln (q_e - q_t)$ vs $t$ |
| Pseudo second order     | $\frac{t}{q_t} = \frac{1}{k_2 q_e^2} + \frac{1}{q_e}$ <p>where <math>q_e</math> and <math>q_t</math> represents the adsorption capacity of adsorbent at equilibrium and time <math>t</math> in mg/g, respectively, <math>k_2</math> is the pseudo second-order rate constant, and <math>t</math> is the contact time (min)</p>                                                              | Rate-limiting step in adsorption is controlled by chemical interactions                         | $t/q_t$ versus $t$       |
| Interparticle diffusion | $\ln \frac{C_t}{C_o} = -k_f \frac{A}{V} t$ <p>where <math>C_o</math> is the initial metal concentration, <math>C_t</math> is the concentration at time <math>t</math>, <math>A/V</math> is the external sorption area to the total solution volume, <math>t</math> is the sorption time and <math>k_f</math> is the external diffusion coefficient (<math>m^2 g^{-1} min L^{-1}</math>)</p> | The ionic adsorption of the contaminant is adsorbed only on the outer surface of the adsorbent. | $\ln (C_t - C_o)$ vs $t$ |
| Intraparticle diffusion | $q_t = k_d t^{1/2}$ <p>where <math>q_t</math> is the adsorption capacity at time <math>t</math>, <math>t^{0.5}</math> is the half-life time in second, and <math>k_d</math> (<math>mg/g \text{ min}^{0.5}</math>) is the rate constant of intraparticle diffusion</p>                                                                                                                       | Rate-limiting step includes the transference of solute from solution into adsorbent pores       | $q_t$ versus $t^{0.5}$   |

**Table S2.** The BET results for all samples

| Sample  | BET Surface Area (m <sup>2</sup> /g) | Pore Volume (cm <sup>3</sup> /g) | Pore Size (Å) |
|---------|--------------------------------------|----------------------------------|---------------|
| nZVI    | 1.5724                               | 0.0042                           | 107.0115      |
| Gr      | 14.1724                              | 0.0484                           | 136.6348      |
| Gr-nZVI | 6.7619                               | 0.0298                           | 176.0732      |

**Table S3.** The CEC for all samples

| Sample  | Cation Exchange Capacity (meq/100g) |
|---------|-------------------------------------|
| nZVI    | 4.03±5.57                           |
| Gr      | 2.70±9.03                           |
| Gr-nZVI | 1.68±7.24                           |

**Table S4.** The XRF results for all adsorbent materials

| Elements                       | nZVI   | Gr     | Gr-nZVI |
|--------------------------------|--------|--------|---------|
| SiO <sub>2</sub>               | 0.26%  | 42.86% | 20.62%  |
| Al <sub>2</sub> O <sub>3</sub> | -      | 34.12% | 16.65%  |
| Fe <sub>2</sub> O <sub>3</sub> | 54.99% | 4.08%  | 30.81%  |
| Na <sub>2</sub> O              | 34.19% | -      | 19.09%  |
| Cl                             | 0.31%  | -      | 0.12%   |
| Cr <sub>2</sub> O <sub>3</sub> | 0.02%  | -      | 0.02%   |
| K <sub>2</sub> O               | -      | 1.53%  | 0.95%   |
| TiO <sub>2</sub>               | -      | 0.27%  | 0.18%   |
| MgO                            | -      | 0.13%  | 0.08%   |
| CaO                            | -      | -      | 0.05%   |
| P <sub>2</sub> O <sub>5</sub>  | -      | 0.05%  | 0.11%   |
| SO <sub>3</sub>                | -      | 0.04%  | -       |
| ZrO <sub>2</sub>               | -      | 0.03%  | 0.06%   |
| Rb <sub>2</sub> O              | -      | 0.02%  | 0.02%   |
| MnO                            | 0.01%  | 0.01%  | -       |
| Ga <sub>2</sub> O <sub>3</sub> | -      | 0.01%  | -       |
| V <sub>2</sub> O <sub>5</sub>  | -      | 0.01%  | -       |
| ZnO                            | -      | 0.01%  | -       |
| LOI                            | 10.12% | 16.56% | 11.58%  |
| Total                          | 99.89% | 99.69% | 100.34% |

**Table S5.** Model parameters for concentration

| Sample       | Heavy Metals Element | Linear Equation      |                | Langmuir Equation    |                       |                | Freundlich Equation  |      |                |
|--------------|----------------------|----------------------|----------------|----------------------|-----------------------|----------------|----------------------|------|----------------|
|              |                      | K <sub>d</sub> (L/g) | R <sup>2</sup> | K <sub>L</sub> (L/g) | A <sub>m</sub> (mg/g) | R <sup>2</sup> | K <sub>F</sub> (L/g) | 1/n  | R <sup>2</sup> |
| nZVI         | Pb                   | 7.55                 | 0.56           | 820.00               | 36.90                 | 0.95           | 1.18                 | 0.14 | 0.02           |
|              | Cu                   | 5.47                 | 0.85           | 266.87               | 14.14                 | 0.11           | 1.62                 | 0.63 | 0.97           |
|              | Co                   | 2.21                 | 0.72           | 1600.92              | 10.25                 | 0.99           | 31.27                | 1.62 | 0.24           |
|              | Cd                   | 16.95                | 0.79           | 679.54               | 16.92                 | 0.96           | 8.37                 | 0.92 | 0.50           |
|              | Ni                   | 8.29                 | 0.92           | 305.07               | 11.07                 | 0.99           | 22.87                | 1.45 | 0.40           |
|              | Zn                   | 2.34                 | 0.87           | 71.67                | 9.22                  | 0.98           | 16.38                | 2.34 | 0.78           |
| Granite (Gr) | Pb                   | 0.01                 | 0.68           | 0.19                 | 1.10                  | 0.68           | 195.16               | 0.15 | 0.02           |
|              | Cu                   | 0.22                 | 1.00           | 0.03                 | 0.56                  | 0.77           | 19.61                | 0.75 | 0.52           |
|              | Co                   | 0.01                 | 0.56           | 0.00                 | 0.22                  | 0.25           | 36.37                | 0.50 | 0.26           |
|              | Cd                   | 0.27                 | 0.96           | 0.97                 | 1.82                  | 0.98           | 14.25                | 0.60 | 0.62           |
|              | Ni                   | 0.08                 | 0.91           | 0.23                 | 1.81                  | 0.92           | 47.29                | 1.05 | 0.25           |
|              | Zn                   | 0.02                 | 0.89           | 0.04                 | 1.89                  | 0.24           | 63.33                | 0.83 | 0.84           |
| Gr-nZVI      | Pb                   | 33.99                | 0.91           | 3667.44              | 54.64                 | 0.66           | 3.96                 | 0.37 | 0.36           |
|              | Cu                   | 14.53                | 0.40           | 5372.88              | 9.67                  | 0.49           | 1.48                 | 0.54 | 0.63           |
|              | Co                   | 19.79                | 0.89           | 62.47                | 8.06                  | 0.96           | 1149.74              | 3.94 | 0.37           |
|              | Cd                   | 121.84               | 0.90           | 956.44               | 11.67                 | 1.00           | 215575.80            | 5.12 | 0.91           |
|              | Ni                   | 1.14                 | 0.84           | 464.61               | 16.45                 | 0.98           | 242.21               | 2.43 | 0.51           |
|              | Zn                   | 21.71                | 0.75           | 872.33               | 14.31                 | 0.99           | 7271.10              | 3.75 | 0.90           |

**Table S6.** Kinetic parameters on heavy metals adsorption onto adsorbents

| Sample  | Heavy Metals | Type of Solution | q <sub>e</sub> experimental (mg/g) | Pseudo first Order     |                                   |                | Pseudo Second Order       |                                   |                | External Diffusion Models (Interparticle diffusion)  |                | Internal Diffusion Models (Intraparticle diffusion)     |      |                |
|---------|--------------|------------------|------------------------------------|------------------------|-----------------------------------|----------------|---------------------------|-----------------------------------|----------------|------------------------------------------------------|----------------|---------------------------------------------------------|------|----------------|
|         |              |                  |                                    | K <sub>1</sub> (1/min) | q <sub>e</sub> calculation (mg/g) | R <sup>2</sup> | K <sub>2</sub> (g/mg min) | q <sub>e</sub> calculation (mg/g) | R <sup>2</sup> | K <sub>d</sub> (mg <sup>-1</sup> min <sup>-1</sup> ) | R <sup>2</sup> | K <sub>d</sub> (mg g <sup>-1</sup> min <sup>0.5</sup> ) | C    | R <sup>2</sup> |
| nZVI    | Pb           | Mix              | 20.69                              | 8.00E-04               | 2.37                              | 0.07           | 2.60                      | 17.89                             | 1.00           | 0.5                                                  | 0.82           | 4.15                                                    | 3.18 | 0.76           |
|         | Cu           | Mix              | 11.85                              | 3.00E-04               | 1.42                              | 0.07           | 6.71                      | 10.32                             | 1.00           | 1.21                                                 | 0.89           | 3.52                                                    | 0.56 | 0.92           |
|         | Co           | Mix              | 7.82                               | 2.00E-05               | 0.98                              | 0.00           | 1.73                      | 6.85                              | 1.00           | 0.80                                                 | 0.91           | 2.32                                                    | 0.37 | 0.92           |
|         | Cd           | Mix              | 7.02                               | 1.20E-03               | 0.30                              | 0.05           | 0.21                      | 6.82                              | 1.00           | 0.44                                                 | 0.84           | 2.31                                                    | 0.37 | 0.96           |
|         | Ni           | Mix              | 7.45                               | 9.00E-04               | 0.37                              | 0.07           | 10.84                     | 7.16                              | 1.00           | 0.87                                                 | 0.90           | 2.43                                                    | 0.39 | 0.92           |
|         | Zn           | Mix              | 8.10                               | 2.00E-04               | 0.58                              | 0.01           | 2.72                      | 7.58                              | 1.00           | 0.74                                                 | 0.91           | 2.58                                                    | 0.41 | 0.92           |
| Gr      | Pb           | Mix              | 2.18                               | 1.60E-02               | 0.50                              | 0.07           | 0.73                      | 2.74                              | 0.95           | 2.40E-03                                             | 0.99           | 0.65                                                    | 0.05 | 0.98           |
|         | Cu           | Mix              | 2.06                               | 2.00E-04               | 0.85                              | 0.00           | 0.72                      | 0.40                              | 0.89           | 9.00E-04                                             | 0.93           | 0.14                                                    | 0.20 | 0.51           |
|         | Co           | Mix              | 1.07                               | 2.90E-03               | 0.27                              | 0.01           | 0.03                      | 1.11                              | 0.81           | 5.00E-04                                             | 0.95           | 0.10                                                    | 0.02 | 0.76           |
|         | Cd           | Mix              | 1.64                               | 1.30E-03               | 0.3                               | 0.13           | 0.33                      | 0.49                              | 0.86           | 5.00E-04                                             | 0.88           | 0.05                                                    | 0.24 | 0.41           |
|         | Ni           | Mix              | 1.19                               | 2.50E-03               | 0.54                              | 0.14           | 0.03                      | 1.19                              | 0.83           | 4.00E-04                                             | 0.83           | 0.14                                                    | 0.03 | 0.92           |
|         | Zn           | Mix              | 1.32                               | 2.30E-03               | 0.31                              | 0.02           | 1.25                      | 0.95                              | 0.98           | 1.00E-03                                             | 0.97           | 0.15                                                    | 0.11 | 0.74           |
| Gr-nZVI | Pb           | Mix              | 17.02                              | 7.00E-04               | 1.37                              | 0.25           | 0.18                      | 15.34                             | 1.00           | 0.08                                                 | 0.92           | 5.31                                                    | 0.77 | 0.93           |
|         | Cu           | Mix              | 11.84                              | 2.00E-04               | 1.52                              | 0.03           | 0.55                      | 10.26                             | 1.00           | 0.17                                                 | 0.93           | 3.47                                                    | 0.54 | 0.92           |
|         | Co           | Mix              | 7.79                               | 3.00E-05               | 1.06                              | 0.00           | 1.91                      | 6.74                              | 1.00           | 0.14                                                 | 0.95           | 2.27                                                    | 0.33 | 0.93           |

|    |     |       |          |      |      |      |      |      |      |      |      |      |      |
|----|-----|-------|----------|------|------|------|------|------|------|------|------|------|------|
| Cd | Mix | 7.04  | 1.60E-03 | 0.30 | 0.21 | 0.08 | 6.61 | 1.00 | 0.11 | 0.96 | 2.19 | 0.30 | 0.94 |
| Ni | Mix | 7.45  | 1.20E-03 | 0.52 | 0.21 | 0.72 | 7.07 | 1.00 | 0.14 | 0.95 | 2.37 | 0.35 | 0.93 |
| Zn | Mix | 10.56 | 6.00E-04 | 3.16 | 0.03 | 0.06 | 7.10 | 1.00 | 0.08 | 0.93 | 2.25 | 0.32 | 0.93 |

---
